# Supplementary material
Source: publisher figshare collection journal article supplement (https://sage.figshare.com/ndownloader/files/14221562)
Supplement: Supplementary file 1 [file 14221562]

**Appendix References: Cited in Tables 1–3**

Baastrup, PC, Poulsen JC, Schou M, Thomsen, K, Amdisen, A. (1970) Prophylactic lithium: double blind discontinuation in manic-depressive and recurrent-depressive disorders. Lancet 296: 326–330.

Baron, M, Gershon, ES, Rudy, V, Jonas, WZ, Buchsbaum, M. (1975) Lithium carbonate response in depression. Prediction by unipolar/bipolar illness, average-evoked response, catechol-O-methyl transferase, and family history. Arch Gen Psychiatry 32: 1107–1111.

Bauer, M, Bschor, T, Kunz, D, Berghöfer, A, Ströhle, A, Müller-Oerlinghausen, B. (2000) Double-blind, placebo-controlled trial of the use of lithium to augment antidepressant medication in continuation treatment of unipolar major depression. Am J Psychiatry 157: 1429–1435.

Baumann, P, Nil, R, Souche, A, Montaldi, S, Baettig, D, Lambert, S, Uehlinger, C, Kasas, A, Amey, M, Jonzier-Perey, M. (1996) Double-blind, placebo-controlled study of citalopram with and without lithium in the treatment of therapy-resistant depressive patients: a clinical, pharmacokinetic, and pharmacogenetic investigation. J Clin Psychopharmacol 16: 307–314.

Bloch, M, Schwartzman, Y, Bonne, O, Lerer, B. (1997) Concurrent treatment of nonresistant major depression with desipramine and lithium: a double-blind, placebo-controlled study. J Clin Psychopharmacol 17: 44–48.

Browne, M, Lapierre, YD, Hrdina, PD, Horn, E. (1990) Lithium as an adjunct in the treatment of major depression. Int Clin Psychopharmacol 5: 103–110.

Bschor, T, Uhr, M, Baethge, C, Lewitzka, U, Ising, M, Erbe, S, Winkelmann, P, Ritter, D. (2013) Acute antidepressive efficacy of lithium monotherapy, not citalopram, depends on recurrent course of depression. J Clin Psychopharmacol 33: 38–44.

Cappiello, A, McDougle, CJ, Delgado, PL, Malison, RT, Jatlow, P, Charney, DS, Heninger, GR, Price, LH. (1998) Lithium and desipramine vs. desipramine alone in the treatment of severe major depression: preliminary study. Int Clin Psychopharmacol 13: 191–198.

Coppen, A, Ghose, K, Rao, R, Bailey, J, Peet, M. (1978) Mianserin and lithium in the prophylaxis of depression. Br J Psychiatry 133: 206–210.

Coppen, A, Montgomery, SA, Gupta, RK, Bailey, JE. (1976) Double-blind comparison of lithium carbonate and maprotiline in the prophylaxis of the affective disorders. Br J Psychiatry 128: 479–485.

Coppen, A, Noguera, R, Bailey, J, Burns, BH, Swani, MS, Hare, EH, Gardner, R, Maggs, R. (1971) Prophylactic lithium in affective disorders: controlled trial. Lancet 2: 275–279.

Cundall, RL, Brooks, PW, Murray, LG. (1972) Controlled evaluation of lithium prophylaxis in affective disorders. Psychol Med 2: 308–311.

Fieve, RR, Kumbaraci, T, Dunner, DL. (1976) Lithium prophylaxis of depression in bipolar I, bipolar II, and unipolar patients. Am J Psychiatry 133: 925–929.

Franchini, L, Gasperini, M, Smeraldi, E. (1994) A 24-month follow-up study of unipolar subjects: comparison between lithium and fluvoxamine. J Affect Disord 32: 225–231.

Glen, AI, Johnson, AL, Shepherd, M. (1984) Continuation therapy with lithium and amitriptyline in unipolar depressive illness: a randomized, double-blind, controlled trial. Psychol Med 14: 37–50.

Greil, W, Ludwig-Mayerhofer, W, Erazo, N, Engel, RR, Czernik, A, Giedke, H, Müller-Oerlinghausen, B, Osterheider, M, Rudolf, GA, Sauer, H, Tegeler, J, Wetterling, T. (1996) Comparative efficacy of lithium and amitriptyline in the maintenance treatment of recurrent unipolar depression: randomized study. J Affect Disord 40: 179–190.

Hardy, BG, Shulman, KI, Zucchero, C. (1997) Gradual discontinuation of lithium augmentation in elderly patients with unipolar depression. J Clin Psychopharmacol 17: 22–26.

Heninger, GR, Charney, DS, Sternberg, DE. (1983) Lithium carbonate augmentation of antidepressant treatment. An effective prescription for treatment-refractory depression. Arch Gen Psychiatry 40: 1335–1342.

Januel, D, Poirier, M-F, D’alche-Birée, F, Dib, M, Olié, J-P. (2003) Multicenter double-blind randomized parallel-group clinical trial of efficacy of the combination clomipramine (150 mg/day) plus lithium carbonate (750 mg/day) versus clomipramine (150 mg/day) plus placebo in the treatment of unipolar major depression. J Affect Disord 76: 191–200.

Joffe, RT, Singer, W, Levitt, AJ, MacDonald, C. 1993. A placebo-controlled comparison of lithium and triiodothyronine augmentation of tricyclic antidepressants in unipolar refractory depression. Arch. Gen. Psychiatry 50: 387–393.

Johnstone, EC, Owens, DG, Lambert, MT, Crow, TJ, Frith, CD, Done, DJ. (1990). Combination tricyclic antidepressant and lithium maintenance medication in unipolar and bipolar depressed patients. J Affect Disord 20: 225–233.

Kane, JM, Quitkin, FM, Rifkin, A, Ramos-Lorenzi, JR, Nayak, DD, Howard, A. (1982) Lithium carbonate and imipramine in the prophylaxis of unipolar and bipolar II illness: a prospective, placebo-controlled comparison. Arch Gen Psychiatry 39: 1065–1069.

Katona, CL, Abou-Saleh, MT, Harrison, DA, Nairac, BA, Edwards, DR, Lock, T, Burns, RA, Robertson, MM. (1995) Placebo-controlled trial of lithium augmentation of fluoxetine and lofepramine. Br J Psychiatry 166: 80–86.

Khan, MC. (1981) Lithium carbonate in the treatment of acute depressive illness. Biol Psychiatry 161: 244–248.

Khan, MC, Wickham, EA, Reed, JV. (1987) Lithium versus placebo in acute depression: a clinical trial. Int Clin Psychopharmacol 2: 47–54.

Kok, RM, Vink, D, Heeren, TJ, Nolen, WA. (2007) Lithium augmentation compared with phenelzine in treatment-resistant depression in the elderly: an open, randomized, controlled trial. J Clin Psychiatry 68, 1177–1185.

Linder, J, Fyrö, B, Pettersson, U, Werner, S. (1989) Acute antidepressant effect of lithium is associated with fluctuation of calcium and magnesium in plasma: double-blind study on the antidepressant effect of lithium and clomipramine. Acta Psychiatr Scand 80: 27–36.

Lingjaerde, O, Edlund, AH, Gormsen, CA, Gottfries, CG, Haugstad, A, Hermann, IL, Hollnagel, P, Mäkimattilla, A, Rasmussen, KE, Remvig, J, Robak, OH. (1974) The effects of lithium carbonate in combination with tricyclic antidepressants in endogenous depression. A double-blind, multicenter trial. Acta Psychiatr Scand 50: 233–242.

Nierenberg, AA, Papakostas, GI, Petersen, T, Montoya, HD, Worthington, JJ, Tedlow, J, Alpert, JE, Fava, M. (2003) Lithium augmentation of nortriptyline for subjects resistant to multiple antidepressants. J Clin Psychopharmacol 23: 92–95.

Prien, RF, Klett, CJ, Caffey, EM. (1973) Lithium carbonate and imipramine in prevention of affective episodes. A comparison in recurrent affective illness. Arch Gen Psychiatry 29: 420–425.

Prien, RF, Kupfer, DJ, Mansky, PA, Small, JG, Tuason, VB, Voss, CB, Johnson, WE. (1984) Drug therapy in the prevention of recurrences in unipolar and bipolar affective disorders. Report of the NIMH Collaborative Study Group comparing lithium carbonate, imipramine, and a lithium carbonate-imipramine combination. Arch Gen Psychiatry 41: 1096–1104.

Sackeim, HA, Haskett, RF, Mulsant, BH, Thase, ME, Mann, JJ, Pettinati, HM, Greenberg, RM, Crowe, RR, Cooper, TB, Prudic, J. (2001) Continuation pharmacotherapy in the prevention of relapse following electroconvulsive therapy: a randomized controlled trial. JAMA 285: 1299–1307.

Stein, G, Bernadt, M. (1993) Lithium augmentation therapy in tricyclic-resistant depression. A controlled trial using lithium in low and normal doses. Br J Psychiatry 162: 634–640.

Watanabe, S, Ishino, H, Otsuki, S. (1975) Double-blind comparison of lithium carbonate and imipramine in treatment of depression. Arch Gen Psychiatry 32: 659–668.

Wilkinson, D, Holmes, C, Woolford, J, Stammers, S, North, J. (2002) Prophylactic therapy with lithium in elderly patients with unipolar major depression. Int J Geriatr Psychiatry 17: 619–622.

Zusky, PM, Biederman, J, Rosenbaum, JF, Manschreck, TC, Gross, CC, Weilberg, JB, Gastfriend, DR. (1988) Adjunct low dose lithium carbonate in treatment-resistant depression: a placebo-controlled study. J Clin Psychopharmacol 8: 120–124.
